# Supplementary material
Source: publisher figshare collection journal article supplement (https://acs.figshare.com/ndownloader/files/12909641)
Supplement: Supplementary file 1 [file 12909641]

## Supporting Information

### **Extended Visible Light Absorption Combined with Promoted Charge Carrier Transfer in Urea Derived Graphitic Carbon Nitride for Enhanced Photocatalytic Hydrogen Evolution Performances**

*Ping Niu, Huiqiao Li, Ying Ma and Tianyou Zhai\**

*State Key Laboratory of Material Processing and Die & Mould Technology, School of Materials  
Science and Engineering, Huazhong University of Science and Technology (HUST) Wuhan 430074, P.  
R. China*

Corresponding Author

Prof. Tianyou Zhai

E-mail: [zhaity@hust.edu.cn](mailto:zhaity@hust.edu.cn)

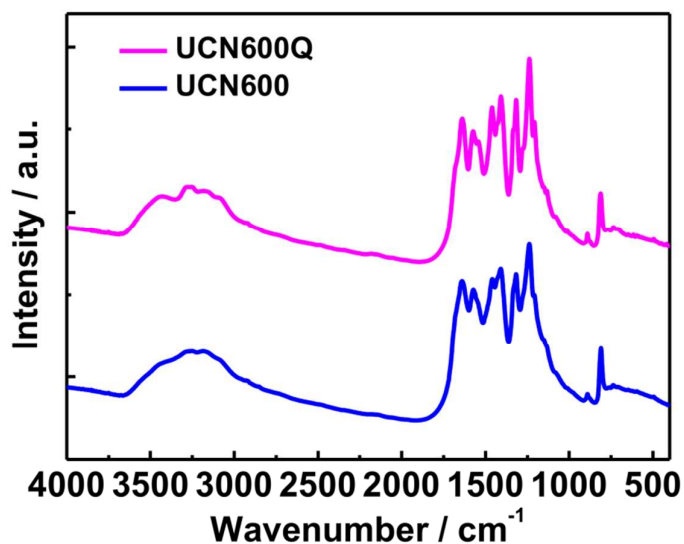

**Figure S1.** The FTIR spectra of UCN600 and UCN600Q.

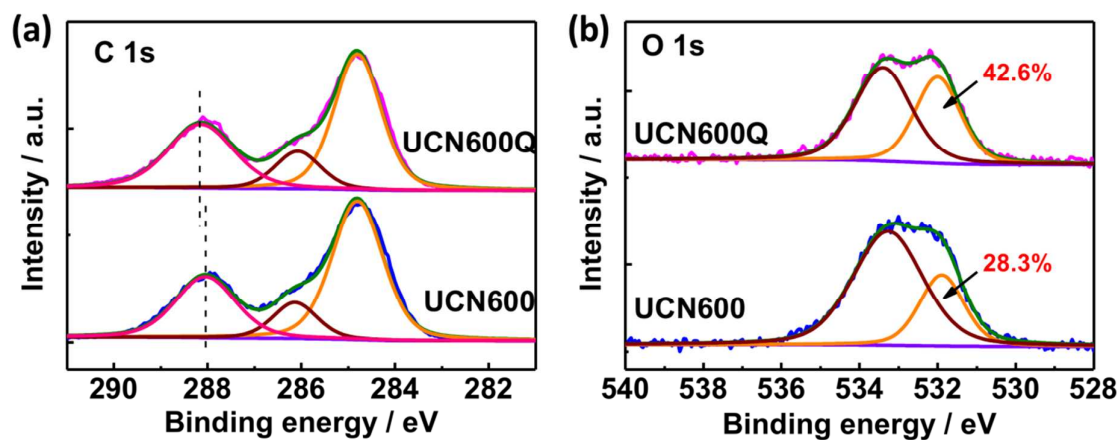

**Figure S2.** The deconvoluted (a) C 1s and (b) O1s spectra of UCN600 and UCN600Q recorded by high resolution XPS characterization.

**Table S1.** The elemental analysis results of the samples.

| Samples       | UCN500 | UCN500Q | UCN600 | UCN600Q |
|---------------|--------|---------|--------|---------|
| N[at%]/C[at%] | 1.522  | 1.455   | 1.487  | 1.482   |

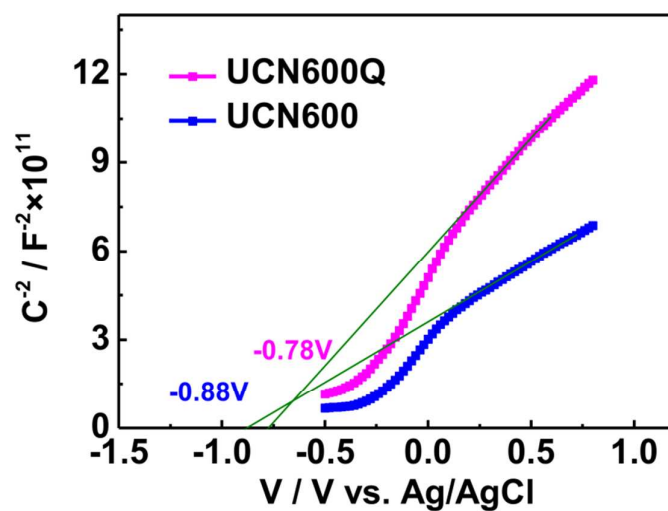

**Figure S3.** The Mott-Schottky plots of UCN600 and UCN600Q.

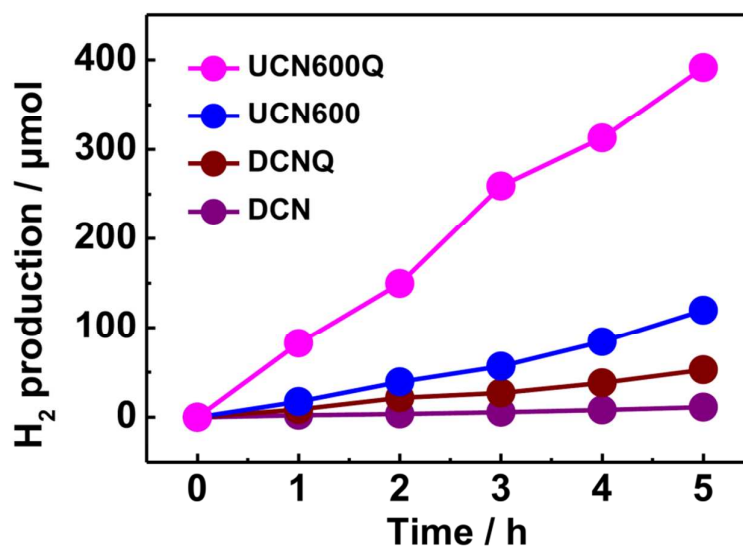

**Figure S4.** The time courses of hydrogen evolution for DCN, DCNQ, UCN600 and UCN600Q under visible light irradiation ( $\lambda > 420 \text{ nm}$ ). The reaction was carried out in water containing 10 vol% triethanolamine with 6 wt% Pt loaded photocatalysts (20 mg).

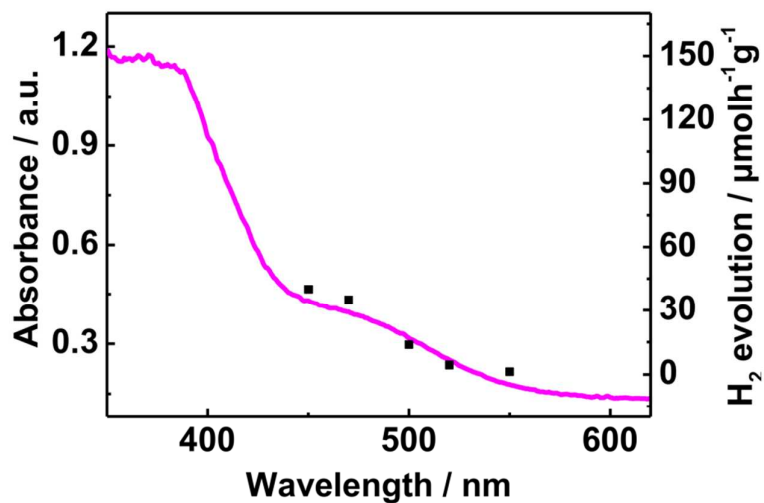

**Figure S5.** The UV-Vis spectra and the wavelength dependent photocatalytic hydrogen production activities of UCN600Q. The reaction was carried out in water containing 10 vol% triethanolamine with 6 wt% Pt loaded photocatalysts (20 mg). The intensity of each monochromatic light was normalized to be 10 mW/cm<sup>2</sup>.

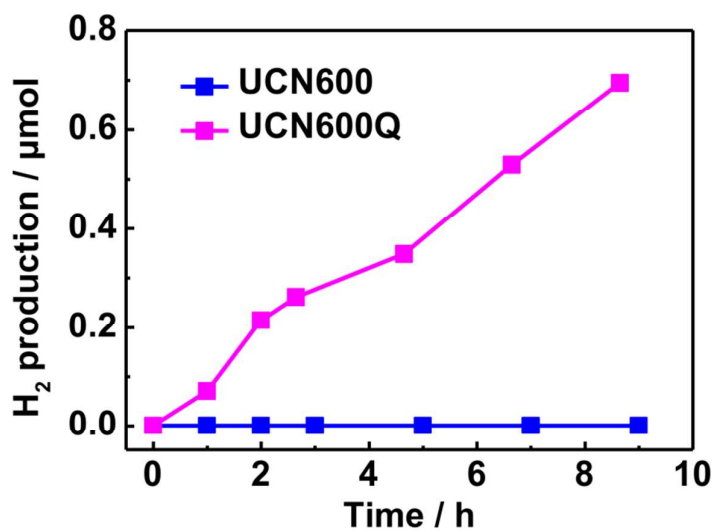

**Figure S6.** The comparison of photocatalytic hydrogen production activities between UCN600 and UCN600Q under monochromatic light irradiation of  $\lambda = 550$  nm. The reaction was carried out in water containing 10 vol% triethanolamine with 6 wt% Pt loaded photocatalysts (20 mg).

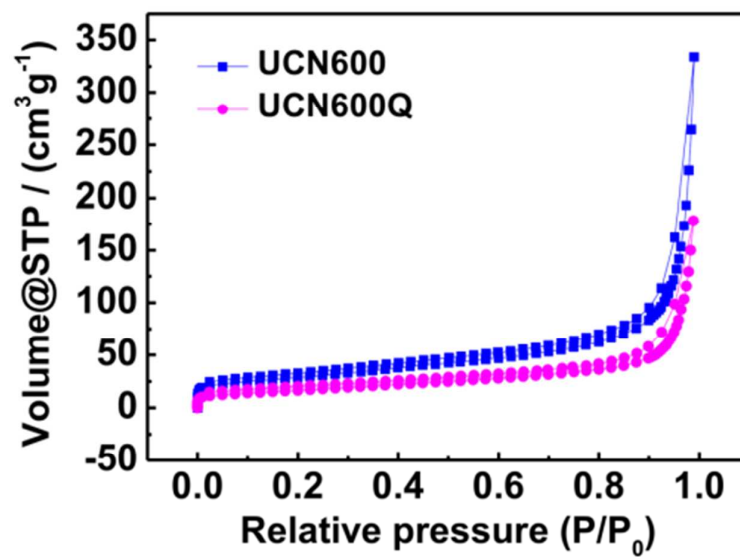

**Figure S7.** The isotherm nitrogen adsorption curves of UCN600 and UCN600Q.

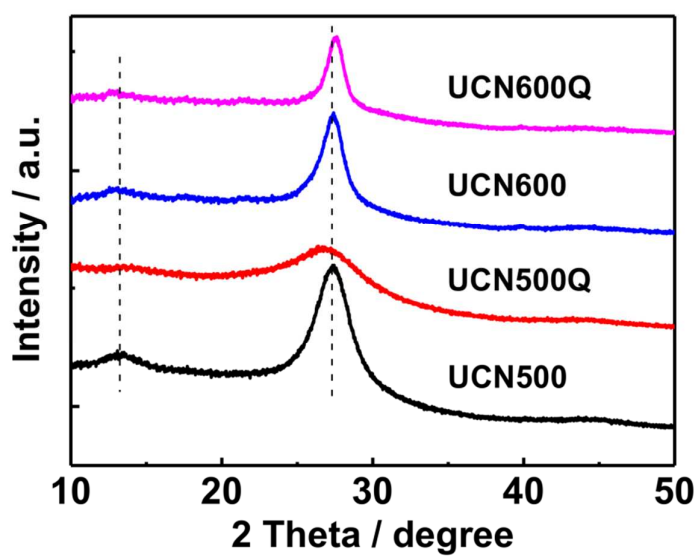

**Figure S8.** The XRD patterns of UCN500, UCN500Q, UCN600 and UCN600Q.

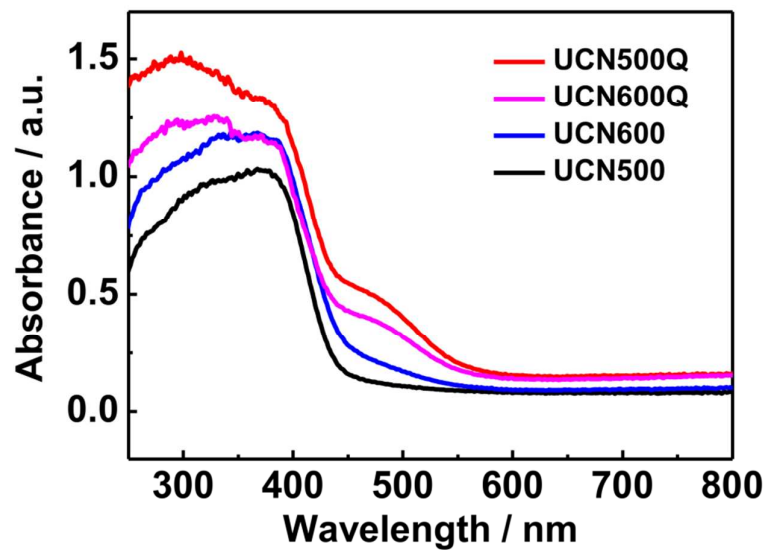

**Figure S9.** The UV-Vis absorption spectra of UCN500, UCN500Q, UCN600 and UCN600Q.

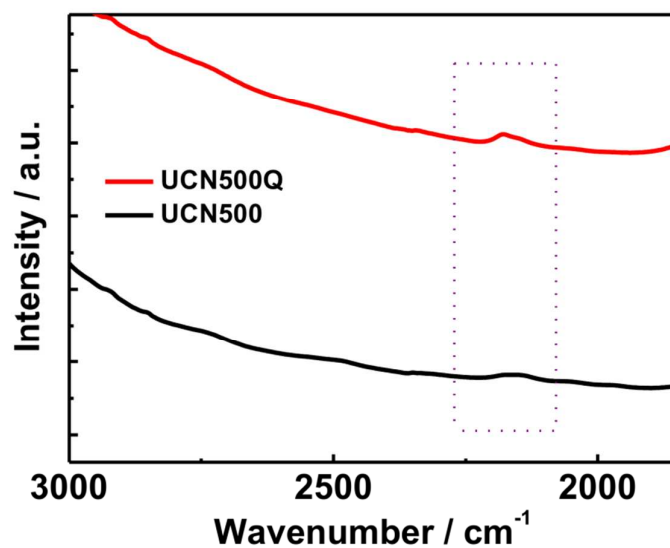

**Figure S10.** The FTIR spectra of UCN500 and UCN500Q in the region from 1850  $\text{cm}^{-1}$  to 3000  $\text{cm}^{-1}$ .

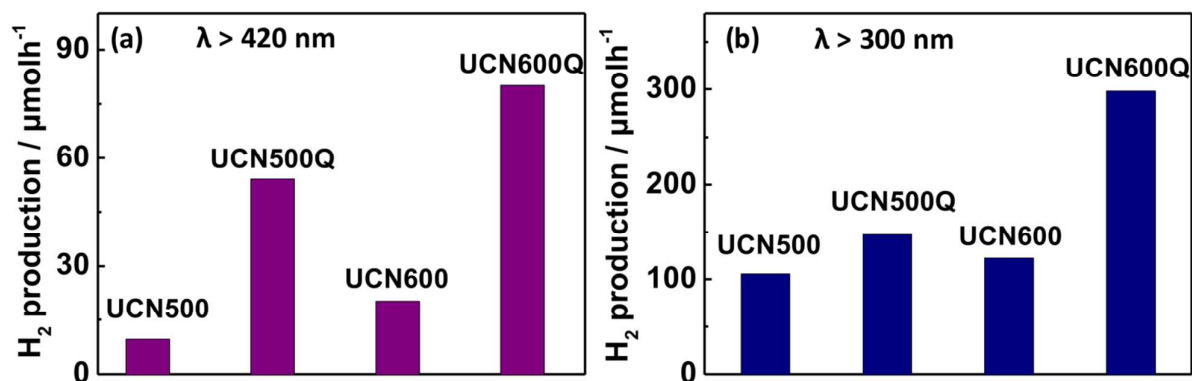

**Figure S11.** Hydrogen evolution activities of 6 wt% Pt loaded photocatalysts (20mg) in water containing 10 vol% triethanolamine under (a) visible light ( $\lambda > 420 \text{ nm}$ ) and (b) full-arc ( $\lambda > 300 \text{ nm}$ ) irradiation.

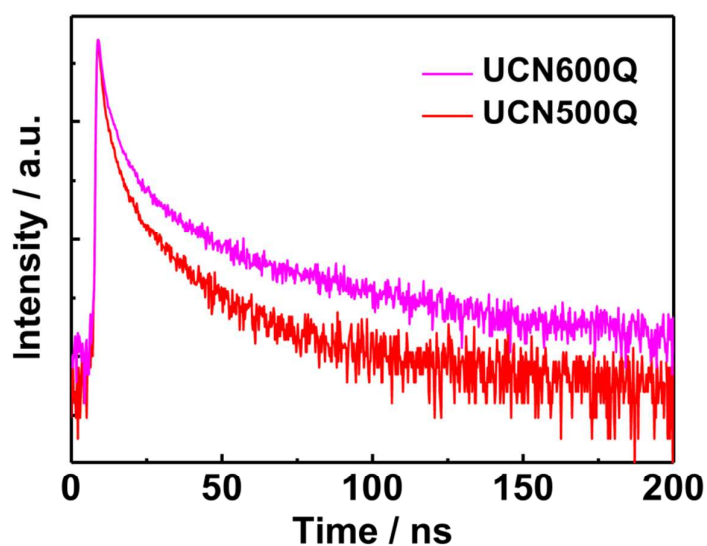

**Figure S12.** Time-resolved fluorescence decay spectra of UCN500Q and UCN600Q recorded at the photoluminescence emission peaks using incident light of 375 nm from picosecond pulsed light-emitting diode at room temperature.
